# Supplementary material
Source: publisher figshare collection journal article supplement (https://acs.figshare.com/ndownloader/files/3895102)
Supplement: Supplementary file 1 [file 3895102]

## Supporting Information

### Conversion of Chicken Feather Waste to N-doped Carbon Nanotubes for the Catalytic Reduction of 4-Nitrophenol

Lei Gao,<sup>†</sup> Ran Li,<sup>†</sup> Xuelin Sui,<sup>‡</sup> Ren Li,<sup>†</sup> Changle Chen<sup>\*\*‡</sup> & Qianwang Chen<sup>\*\*†</sup>

<sup>†</sup> Hefei National Laboratory for Physical Sciences at Microscale and Department of Materials Science & Engineering, University of Science and Technology of China, Hefei, China. Fax: +86 551 63603005; Tel: +86 551 63603005; E-mail: cqw@ustc.edu.cn

<sup>‡</sup> CAS Key Laboratory of Soft Matter Chemistry and Department of Polymer Science & Engineering, University of Science and Technology of China, Hefei, China. E-mail: changle@ustc.edu.cn

#### Contents

|                                                                                                                        |    |
|------------------------------------------------------------------------------------------------------------------------|----|
| 1. FESEM images of the production of different batch of chicken feathers                                               | S1 |
| 2. TEM images of the production of different batch of chicken feathers                                                 | S2 |
| 3. The catalytic activities of the N-CNTs and Ni <sub>3</sub> S <sub>2</sub> @C of different batch of chicken feathers | S3 |

#### 1. FESEM images of the production of different batch of chicken feathers

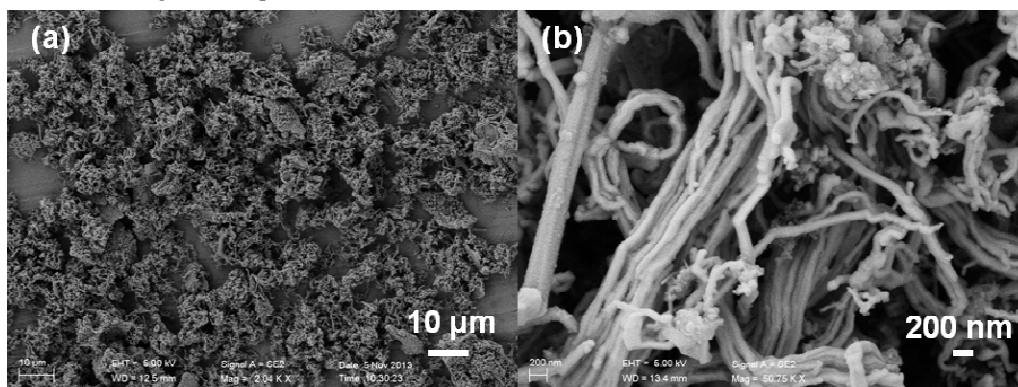

**Figure S1.** (a, b) FESEM images of the Ni<sub>3</sub>S<sub>2</sub>@C sample of different batch of chicken feathers, at 650 °C for 3 h.

## 2. TEM images of the production of different batch of chicken feathers

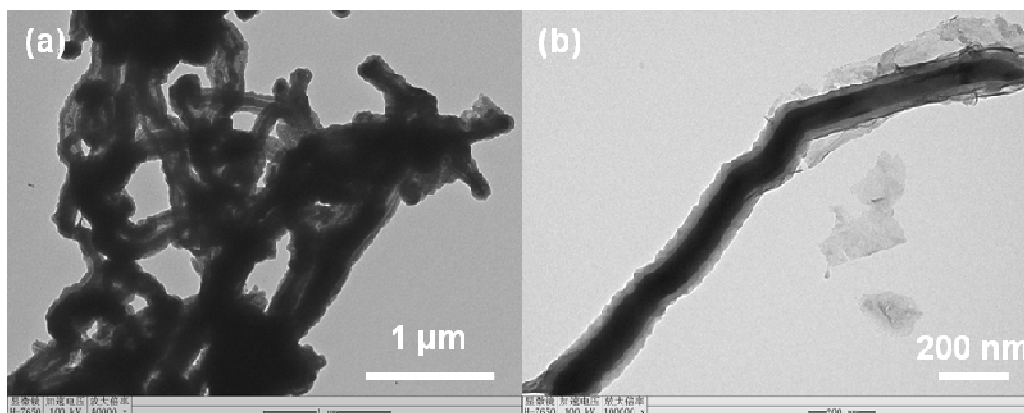

**Figure S2.** (a, b) TEM images of the  $\text{Ni}_3\text{S}_2@\text{C}$  sample of different batch of chicken feathers, at 650 °C for 3 h.

## 3. The catalytic activities of the N-CNTs and $\text{Ni}_3\text{S}_2@\text{C}$ of different batch of chicken feathers

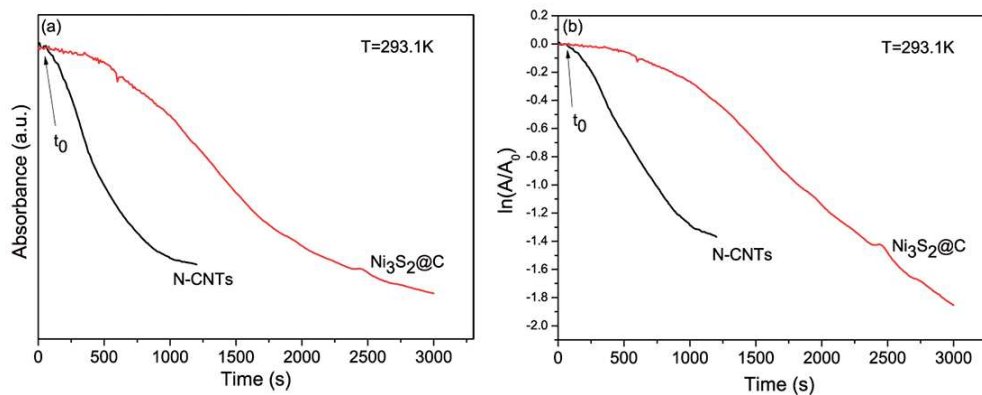

**Figure S3.** (a, b) time curves of the absorbance at 400 nm measured for sample  $\text{Ni}_3\text{S}_2@\text{C}$  and N-CNTs with 4-NP and  $\text{NaBH}_4$  ratio 1: 100 at room temperature, which is the production of different batch of chicken feathers.
